# Supplementary material for: miR-9-Mediated Inhibition of EFEMP1 Contributes to the Acquisition of Pro-Tumoral Properties in Normal Fibroblasts
Source: Cells. 2020 Sep 22;9(9):2143. doi: 10.3390/cells9092143 (PMC7565260; doi:10.3390/cells9092143)
Supplement: Supplementary file 1 [file cells-09-02143-s001.zip]

Archive with 9 entries (9 files):
- Figure S1.jpg
- Figure S2.jpeg
- Figure S3.jpeg
- Figure S4.jpeg
- Figure S5.jpeg
- Figure S6.jpeg
- Figure S7.jpeg
- Supplementary Figure Legends.pdf
- Table S1.xlsx
