# Supplementary material for: miR-9-Mediated Inhibition of EFEMP1 Contributes to the Acquisition of Pro-Tumoral Properties in Normal Fibroblasts
Source: Cells. 2020 Sep 22;9(9):2143. doi: 10.3390/cells9092143 (PMC7565260; doi:10.3390/cells9092143)
Supplement: Supplementary file 1 [file cells-09-02143-s001.zip › Table S1.xlsx]

## Sheet: Suppementary_Table1
vCAF(Bartoscheket.al.)	mCAF(Bartoscheket.al.)	endothelial_metagene2(WinslowS,et.al.)	ECMmetagene2(Winslow,Set.al.)
ESAM	DCN	CLEC14A	COL1A2
GNG11	COL12A1	CXorf36	COL3A1
HIGD1B	MMP2	ARHGEF15	COL5A2
COX4I2	LUM	CD34	FAP
CYGB	MRC2	TIE1	COL1A1
GJA4	BICC1	ESAM	COL5A1
ENG	LRRC15	CDH5	COL6A3
	MFAP5	ROBO4	ADAM12
	COL3A1	MYCT1	DACT1
	MMP14	PTPRB	FBN1
	SPON1	TEK	POSTN
	PDGFRL	ELTD1	THBS2
	SERPINF1		CDH11
	LRP1		VCAN
	GFPT2		DCN
	CTSK		GLT8D2
	CDH11		LUM
	ITGBL1
	COL6A2
	POSTN
	CCDC80
	LOX
	VCAN
	COL1A1
	FBN1
	COL1A2
	PDPN
	COL6A1
	FSTL1
	COL5A2
	AEBP1
1	Spatiallyandfunctionallydistinctsubclassesofbreastcancer-associatedfibroblastsrevealedbysinglecellRNAsequencing
2	Theexpressionpatternofmatrix-producingtumorstromaisofprognosticimportanceinbreastcancer
3	Anendothelialgenesignaturescorepredictspooroutcomeinpatientswithendocrinetreated,lowgenomicgradebreasttumors
4	Astroma-relatedgenesignaturepredictsresistancetoneoadjuvantchemotherapyinbreastcancer
5	Cisplatin-resistanttriple-negativebreastcancersubtypes:multiplemechanismsofresistance
7	Oncogenicpathwaysignaturesinhumancancersasaguidetotargetedtherapies
